# Supplementary material for: Route selection and reaction engineering for sustainable metabolite synthesis
Source: Royal Society of Chemistry journal article supplement (doi:10.1039/d3re00222e), 2023-01-01
Supplement: d3re00222e1.pdf [file d3re00222e1.pdf]

ARTICLE

## Route Selection and Reaction Engineering for Sustainable Metabolite Synthesis

Received 00th January 20xx,  
Accepted 00th January 20xx

Roland Wohlgemuth<sup>a,b,c\*</sup>

DOI: 10.1039/x0xx00000x

Some specialized service companies, centers and research institutions are listed here, for example providing services for metabolite synthesis (see table 1 for a selection of service institutions), and for the analysis and identification of metabolites (see table 2 for a selection of service institutions).

### Electronic Supplementary Information

Table 1 lists some service companies, centers and research institutions which are providing services for metabolite synthesis, isolation and purification.

**Table 2: Organizations providing services for metabolite synthesis, isolation and purification**

| Organization         | Services                                                                    | Location                                                                          | Website                                                                                                                             |
|----------------------|-----------------------------------------------------------------------------|-----------------------------------------------------------------------------------|-------------------------------------------------------------------------------------------------------------------------------------|
| Analyticon Discovery | Natural product isolation and purification<br>Natural product synthesis     | AnalytiCon Discovery GmbH<br>Hermannswerder Haus 17<br>14473 Potsdam<br>Germany   | <a href="https://ac-discovery.com/">https://ac-discovery.com/</a>                                                                   |
| BOC Sciences         | Custom metabolites synthesis                                                | BOC Sciences<br>45-16 Ramsey Road,<br>Shirley, NY 11967,<br>USA                   | <a href="https://www.solutions.bocsci.com/metabolites-synthesis.htm">https://www.solutions.bocsci.com/metabolites-synthesis.htm</a> |
| Chiroblock           | Custom synthesis of commercially not available, complex and novel molecules | ChiroBlock<br>Andresenstraße 1a<br>06766 Wolfen<br>Germany                        | <a href="https://www.chiroblock.com/">https://www.chiroblock.com/</a>                                                               |
| HepatoChem           | Oxidative drug metabolite synthesis<br>Photochemical synthesis              | HepatoChem Inc<br>100 Cummings Center,<br>Suite 360 B<br>Beverly, MA 01915<br>USA | <a href="https://www.hepatochem.com/">https://www.hepatochem.com/</a>                                                               |

<sup>a</sup> MITR, Institute of Applied Radiation Chemistry, Faculty of Chemistry, Lodz University of Technology, 90-537 Lodz, Poland

<sup>b</sup> SKB, Swiss Coordination Committee Biotechnology, 8021 Zurich, Switzerland

<sup>c</sup> ESAB, European Society of Applied Biocatalysis, Brussels, Belgium

|                                              |                                                                                                                                                                                                       |                                                                                                                                                           |                                                                                                                                                                                                                                         |
|----------------------------------------------|-------------------------------------------------------------------------------------------------------------------------------------------------------------------------------------------------------|-----------------------------------------------------------------------------------------------------------------------------------------------------------|-----------------------------------------------------------------------------------------------------------------------------------------------------------------------------------------------------------------------------------------|
| Hypha Discovery                              | Synthesis of Metabolites of Drugs and Agrochemicals<br>Synthesis of Stable isotope-labelled and radio-labelled metabolites<br>Purification of metabolites, natural products and other small molecules | Hypha Discovery Limited<br>154B Brook Drive<br>Milton Park<br>Abingdon<br>OX14 4SD, UK                                                                    | <a href="https://www.hyphadiscovery.com/">https://www.hyphadiscovery.com/</a>                                                                                                                                                           |
| LKT Labs                                     | Natural product isolation and purification<br>Custom synthesis                                                                                                                                        | LKT Laboratories, Inc.<br>545 Phalen Blvd.<br>St. Paul, MN 55130<br>USA                                                                                   | <a href="https://lktlabs.com/">https://lktlabs.com/</a>                                                                                                                                                                                 |
| NUVISAN                                      | Oxidative drug metabolite synthesis<br>Biocatalytic synthesis of glucuronides.                                                                                                                        | NUVISAN Pharma Holding GmbH Wegenerstraße 13<br>89231 Neu-Ulm<br>Germany                                                                                  | <a href="https://www.nuvisan.com/value-chain/discovery/in-vivo-lead-generation/microbiology-metabolite-synthesis.html">https://www.nuvisan.com/value-chain/discovery/in-vivo-lead-generation/microbiology-metabolite-synthesis.html</a> |
| Selcia Ltd.                                  | Custom synthesis of metabolites<br>Custom synthesis of compounds labelled with stable isotopes such as Carbon-13, Nitrogen-15, Deuterium                                                              | Selcia Ltd.<br>Fyfield Business & Research Park,<br>Fyfield Road,<br>Ongar,<br>Essex CM5 0GS<br>United Kingdom                                            | <a href="https://www.selcia.com/selcia-radiolabelling/glp-analytical-chemistry-services-and-metabolite-synthesis">https://www.selcia.com/selcia-radiolabelling/glp-analytical-chemistry-services-and-metabolite-synthesis</a>           |
| SiChem GmbH                                  | Custom synthesis of metabolites<br>Custom synthesis of compounds labelled with stable isotopes such as Carbon-13, Nitrogen-15, Deuterium                                                              | Sirius Fine Chemicals<br>Sichem GmbH<br>Fahrenheitstresse 1 (BITZ) 28359 Bremen<br>Germany                                                                | <a href="https://www.sichem.de/en/custom-synthesis/">https://www.sichem.de/en/custom-synthesis/</a>                                                                                                                                     |
| Metabolite Standards Synthesis Center (MSSC) | Development of the synthesis of labeled and commercially unavailable compounds                                                                                                                        | Metabolite Standards Synthesis Center, Research Triangle Park<br>3040 East Cornwallis Road,<br>P.O. Box 12194, Research Triangle Park, NC 27709-2194, USA | <a href="https://www.rti.org/impact/metabolite-standards-synthesis-center">https://www.rti.org/impact/metabolite-standards-synthesis-center</a>                                                                                         |

Table 2 lists some service companies, centers and research institutions which are providing services for the analysis and identification of metabolites.

**Table 2: Organizations providing services for the analysis and identification of metabolites**

| Organization        | Services                                                                                                                                 | Location                                                                                                                                                            | Website                                                                                                   |
|---------------------|------------------------------------------------------------------------------------------------------------------------------------------|---------------------------------------------------------------------------------------------------------------------------------------------------------------------|-----------------------------------------------------------------------------------------------------------|
| Metabolon           | Single Analyte Assays,<br>Targeted Metabolomics,<br>Untargeted Metabolomics                                                              | Metabolon, Inc.,<br>617 Davis Drive,<br>Suite 100,<br>Morrisville, NC<br>27560, USA;<br>Metabolon GmbH,<br>Zeppelinstraße<br>3<br>85399<br>Hallbergmoos,<br>Germany | <a href="https://www.metabolon.com/">https://www.metabolon.com/</a>                                       |
| Afekta              | Metabolic profiling with LC-MS                                                                                                           | Afekta Technologies Ltd.<br>Microkatu 1<br>PL 1199<br>70210 Kuopio,<br>Finland                                                                                      | <a href="https://afekta.com/">https://afekta.com/</a>                                                     |
| Biocrates           | Metabolic phenotyping services<br>Quantitative profiling assays<br>Specialized quantitative assays<br>Pathway analysis                   | biocrates life sciences AG<br>Eduard-Bodem-Gasse 8<br>6020 Innsbruck<br>Austria                                                                                     | <a href="https://biocrates.com/services/">https://biocrates.com/services/</a>                             |
| Biogenity           | Complete metabolomics workflow<br>Metabolite analysis with mass spectrometry platforms                                                   | Biogenity ApS<br>Niels Jernes Vej 10<br>9220 Aalborg<br>Denmark                                                                                                     | <a href="https://biogenity.com/metabolomics">https://biogenity.com/metabolomics</a>                       |
| CD Genomics         | Lipidomics,<br>Targeted Metabolomics,<br>Untargeted Metabolomics                                                                         | CD Genomics,<br>SUITE 111, 17<br>Ramsey Road,<br>Shirley, NY<br>11967, USA                                                                                          | <a href="https://multiomics.cd-genomics.com/">https://multiomics.cd-genomics.com/</a>                     |
| Creative Proteomics | Metabolite Profiling and Targeted Analysis,<br>Metabolic Pathway Analysis,<br>Metabolomics Data Analysis and Interpretation              | Creative Proteomics,<br>SUITE 115, 17<br>Ramsey Road,<br>Shirley, NY<br>11967, USA                                                                                  | <a href="https://metabolomics.creative-proteomics.com/">https://metabolomics.creative-proteomics.com/</a> |
| Dalton Bioanalytics | MS-based biochemical identification, relative quantification, and statistical analysis of metabolites and lipids with data visualization | Dalton Bioanalytics<br>California NanoSystems Institute<br>570 Westwood Plaza<br>Bldg 114, Rm 6350H, Mail 722710<br>Los Angeles, California<br>90095-7227 USA       | <a href="https://www.daltonbioanalytics.com/">https://www.daltonbioanalytics.com/</a>                     |

|                                     |                                                                                                                                                                                                                                                                                                                                                                                                                                   |                                                                                                               |                                                                               |
|-------------------------------------|-----------------------------------------------------------------------------------------------------------------------------------------------------------------------------------------------------------------------------------------------------------------------------------------------------------------------------------------------------------------------------------------------------------------------------------|---------------------------------------------------------------------------------------------------------------|-------------------------------------------------------------------------------|
| Human Metabolome Technologies (HMT) | Screening a wide range of metabolites in addition to energy metabolism<br>Comprehensive analysis, including unknown metabolites<br>Analysis of small amounts of sample, or when high sensitivity analysis is required<br>Capturing energy metabolism<br>Label analysis using stable isotopes<br>Comprehensive analysis of lipophilic metabolites, in addition to hydrophilic and ionic metabolites<br>Analysis of lipid mediators | Human Metabolome Technologies, Inc.<br>246-2 Mizukami Kakuganji, Tsuruoka, Yamagata 997-0052, Japan           | <a href="https://humanmetabolome.com/ap/">https://humanmetabolome.com/ap/</a> |
| Lipotype                            | Targeted lipidomics analysis<br>Untargeted lipidomics analysis                                                                                                                                                                                                                                                                                                                                                                    | Lipotype GmbH<br>Tatzberg 47<br>01307 Dresden<br>Germany                                                      | <a href="https://www.lipotype.com/">https://www.lipotype.com/</a>             |
| Metware Bio                         | Global Metabolite Profiling<br>Targeted Metabolomics<br>Lipidomics<br>Multi-omics                                                                                                                                                                                                                                                                                                                                                 | Metware Biotechnology Inc.<br>8A Henshaw Street,<br>Woburn, MA<br>01801<br>USA                                | <a href="https://www.metwarebio.com/">https://www.metwarebio.com/</a>         |
| MS-Omics                            | Targeted Analysis of a limited List of predefined Compounds,<br>Global Detection of Metabolites                                                                                                                                                                                                                                                                                                                                   | MS-Omics,<br>Bygstubben 9<br>DK-2950<br>Vedbæk,<br>Denmark                                                    | <a href="https://www.msomics.com/">https://www.msomics.com/</a>               |
| PANOMIX                             | Untargeted metabolome analysis<br>Targeted metabolome analysis<br>Quantitative metabolite analysis<br>Metabolic flux analysis<br>Lipidomics analysis                                                                                                                                                                                                                                                                              | Suzhou PANOMIX Biotech Co., LTD<br>388 Xiping Street, Industrial Park, Suzhou city, Jiangsu Province<br>China | <a href="https://en.panomix.com/">https://en.panomix.com/</a>                 |

|                                                                   |                                                                                                                                                                                                                                |                                                                                                                                                                                                                      |                                                                                                                       |
|-------------------------------------------------------------------|--------------------------------------------------------------------------------------------------------------------------------------------------------------------------------------------------------------------------------|----------------------------------------------------------------------------------------------------------------------------------------------------------------------------------------------------------------------|-----------------------------------------------------------------------------------------------------------------------|
| The Metabolomics Innovation Centre (TMIC)                         | Metabolic profiling including comprehensive metabolite identification, quantification and analysis, Quantitative Metabolomic Services for Biomarker Discovery and Validation, Semi-quantitative Metabolomics, Custom Solutions | National Canadian Core Facility consisting of University of Alberta, University of Victoria, McGill University, McMaster University, University of Calgary, Concordia University, The University of British Columbia | <a href="https://metabolomicscentre.ca/">https://metabolomicscentre.ca/</a>                                           |
| EMBL Metabolomics Core Facility                                   | Targeted Metabolomics Analysis, Untargeted Metabolomics and/or Lipidomics Analysis, Metabolite Identification, Lipid Identification, Drug and Drug Metabolite Analysis, Method Development                                     | Metabolomics Core Facility EMBL Heidelberg, Meyerhofstraße 1, 69117 Heidelberg, Germany                                                                                                                              | <a href="https://www.embl.org/groups/metabolomics/">https://www.embl.org/groups/metabolomics/</a>                     |
| West Coast Metabolomics Center, UC Davis                          | Targeted Metabolite Analysis, Untargeted Metabolite Analysis, Metabolite Identification, Stable Isotope Tracer Analysis                                                                                                        | UC Davis Genome Center, Metabolomics Central Service Core, Room 1212, 451 Health Sciences Drive Davis, CA 95616, USA                                                                                                 | <a href="https://metabolomics.ucdavis.edu/">https://metabolomics.ucdavis.edu/</a>                                     |
| Michigan Regional Comprehensive Metabolomics Resource Core (MRC2) | Targeted Metabolomics, Untargeted Metabolomics, Targeted and untargeted Lipidomics, Fluxomics, Data analysis and visualization                                                                                                 | Michigan Regional Comprehensive Metabolomics Resource Core (MRC2) University of Michigan at Ann Arbor WK Kellogg Eye Center @ Brehm Tower, 1000 Wall Street, Room 6309 Ann Arbor, MI 48105-5714, USA                 | <a href="https://brcf.medicine.umich.edu/cores/metabolomics/">https://brcf.medicine.umich.edu/cores/metabolomics/</a> |

|                                                                                       |                                                                                                                              |                                                                                                                                                                                                                         |                                                                                                                                                                                                             |
|---------------------------------------------------------------------------------------|------------------------------------------------------------------------------------------------------------------------------|-------------------------------------------------------------------------------------------------------------------------------------------------------------------------------------------------------------------------|-------------------------------------------------------------------------------------------------------------------------------------------------------------------------------------------------------------|
| Eastern Regional Comprehensive Metabolomics Resource Core (ERCMRC) at UNC Chapel Hill | Mass spectrometry and NMR Spectroscopy for broad spectrum and targeted metabolomics                                          | Eastern Regional Comprehensive Metabolomics Resource Core (ERCMRC), Department of Nutrition, University of North Carolina at Chapel Hill, UNC Nutrition Research Institute 500 Laureate Way, Kannapolis, NC, 28081. USA | <a href="https://www.rti.org/impact/eastern-regional-comprehensive-metabolomics-research-core-rti-rcmrc">https://www.rti.org/impact/eastern-regional-comprehensive-metabolomics-research-core-rti-rcmrc</a> |
| Southeast Center for Integrated Metabolomics (SECIM)                                  | Global Metabolite Analysis, Targeted Metabolite Analysis.                                                                    | Southeast Center for Integrated Metabolomics (SECIM), University of Florida, Analytical Chemistry, Chemistry Laboratory Building, Room 210, PO Box 117200, Gainesville, FL 32611-7200, USA                              | <a href="http://secim.ufl.edu/">http://secim.ufl.edu/</a>                                                                                                                                                   |
| Resource Center for Stable Isotope-Resolved Metabolomics (RC-SIRM)                    | Sample Preparation; Analytical Measurements by NMR, FTMS, GC & LC, ICPMS; Data reduction/interpretation of complex labeling. | Resource Center for Stable Isotope-Resolved Metabolomics (RC-SIRM) University of Kentucky, Markey Cancer Center, 800 Rose St., Lexington, KY 40536-0093, USA                                                            | <a href="http://bioinformatics.cesb.uky.edu/bin/view/RCSIRM/">http://bioinformatics.cesb.uky.edu/bin/view/RCSIRM/</a>                                                                                       |
| Metabolomics Core at Mayo Clinic                                                      | Untargeted Metabolomics Targeted Metabolomics Isotope Ratio Measurements NMR Specialty Tools                                 | Metabolomics Core at Mayo Clinic, Mayo Clinic, Division of Endocrinology 200 First Street SW, Rochester, MN 55905, USA                                                                                                  | <a href="https://www.mayo.edu/research/core-resources/metabolomics-core/overview">https://www.mayo.edu/research/core-resources/metabolomics-core/overview</a>                                               |

|                                                       |                                                                                                                                                                                                                                                                                                                                |                                                                                                                                                                       |                                                                                                                                                                         |
|-------------------------------------------------------|--------------------------------------------------------------------------------------------------------------------------------------------------------------------------------------------------------------------------------------------------------------------------------------------------------------------------------|-----------------------------------------------------------------------------------------------------------------------------------------------------------------------|-------------------------------------------------------------------------------------------------------------------------------------------------------------------------|
| NIEHS Metabolomics Core Facility                      | Untargeted Metabolomics, Metabolite Identification, Measurement of Molecular Weight Measurement of MS/MS or MSn Measurement of Collisional Cross-section, Untargeted Metabolomics Data Analysis                                                                                                                                | National Institute of Environmental Health Sciences (NIEHS), Metabolomics Core Facility 111w Alexander Dr David P Rall Building Research Triangle Park, NC 27709, USA | <a href="https://www.niehs.nih.gov/research/atniehs/facilities/metabolomics/index.cfm">https://www.niehs.nih.gov/research/atniehs/facilities/metabolomics/index.cfm</a> |
| Scripps Center for Metabolomics and Mass Spectrometry | ESI High Accuracy m/z measurements with mass errors <5 ppm for small molecules typically < 2000 Da; 3000 Da limit ESI Unit Mass results in positive or negative mode, typically 100 - 3,000 Da MALDI Unit mass results Metabolic Pathway Analysis LC/MS and GC/MS Quantitative Analysis Open Access Single Quad, TOF, Rapid-MS | Scripps Center for Metabolomics and Mass Spectrometry The Scripps Research Institute 10650 North Torrey Pines Rd La Jolla, CA 92037 USA                               | <a href="https://masspec.scripps.edu/">https://masspec.scripps.edu/</a>                                                                                                 |
| PHRT Center for Metabolomics and Lipidomics           | Untargeted Metabolomics (LC-MS) HT Metabolomics (FIA-MS, untargeted): CHF 30 per sample and mode. Normally, only negative mode analysis is needed. Recommended for cellular extracts and supernatants. Lipidomics (LC-MS, untargeted): CH                                                                                      | PHRT Center for Metabolomics and Lipidomics Institute of Molecular Systems Biology ETH Zurich Otto-Stern-Weg 3 8093 Zürich Switzerland                                | <a href="https://imsb.ethz.ch/research/zamboni/ext/srv.html">https://imsb.ethz.ch/research/zamboni/ext/srv.html</a>                                                     |

|                                   |                                                                                                                                                                                                                                                                                             |                                                                                                                                                                                    |                                                                                                           |
|-----------------------------------|---------------------------------------------------------------------------------------------------------------------------------------------------------------------------------------------------------------------------------------------------------------------------------------------|------------------------------------------------------------------------------------------------------------------------------------------------------------------------------------|-----------------------------------------------------------------------------------------------------------|
| Functional Genomics Center Zurich | Absolute metabolite quantification (targeted)<br>Global metabolite profiling<br>Global small molecules profiling<br>Method development<br>Statistical analysis and cross-omics support                                                                                                      | Functional Genomics Center Zurich<br>Joint Facility of ETH Zürich and the University of Zurich<br>Irchel Campus<br>Winterthurerstrasse 190<br>8057 Zürich<br>Switzerland           | <a href="https://fgcz.ch/the-center.html">https://fgcz.ch/the-center.html</a>                             |
| Metabolomics Unit                 | Single pathway targeted analyses (absolute quantification),<br>Multiple pathway targeted analyses - polar metabolites (relative quantification)<br>Multiple pathway targeted analyses - complex lipids (absolute quantification),<br>Stable isotope-assisted analyses (Untargeted analyses) | Metabolomics Unit, Faculty of Biology and Medicine, Université de Lausanne<br>Metabolomics Platform (MEP)<br>Quartier UNIL-CHUV, Rue du Bugnon 19, CH-1005 Lausanne<br>Switzerland | <a href="https://www.unil.ch/metabolomics/en/home.html">https://www.unil.ch/metabolomics/en/home.html</a> |
| National Phenome Centre           | Complete solutions for the Metabolome                                                                                                                                                                                                                                                       | National Phenome Centre<br>Imperial College<br>London<br>South Kensington<br>Campus<br>London SW7 2AZ<br>United Kingdom                                                            | <a href="https://phenomecentre.org/">https://phenomecentre.org/</a>                                       |
| MetaboHUB                         | Metabolomic profiling<br>Metabolite identification and quantitation<br>Isotopic enrichment measurement and fluxomics                                                                                                                                                                        | MetaboHUB<br>National infrastructure in metabolomics & fluxomics<br>135 Avenue de Rangueil,<br>31400,<br>Toulouse,<br>France                                                       | <a href="https://www.metabohub.fr/home.html">https://www.metabohub.fr/home.html</a>                       |



Table 2.
